# Supplementary material for: Facile and green preparation of biobased graphene oxide/furan resin nanocomposites with enhanced thermal and mechanical properties
Source: Royal Society of Chemistry journal article supplement (doi:10.1039/c6ra11247a), 2016-01-01
Supplement: c6ra11247a1.pdf [file c6ra11247a1.pdf]

**Supplementary Material for**

**Facile and green preparation of biobased graphene oxide/furan resin  
nanocomposites with enhanced thermal and mechanical properties**

Chen Li<sup>a, b</sup> Shengfang Li,<sup>b, c\*</sup> and Shilin Yan<sup>a</sup>

*<sup>a</sup>School of Materials Science and Engineering, Wuhan University of Technology,  
Whuhan 430070, PR China*

*<sup>b</sup>School of Chemistry and Chemical Engineering, Hubei Polytechnic University,  
Huangshi 435003, PR China, E-mail: lishengf\_@163.com*

*<sup>c</sup>Hubei Key Laboratory of Mine Environmental Pollution Control and Remediation,  
Hubei Polytechnic University, Huangshi 435003, PR China*

---

**Experimental section**

\*Corresponding author. Tel: +86 18271671365  
E-mail address: lishengf\_@163.com (Prof. S. Li).

Fig. S1

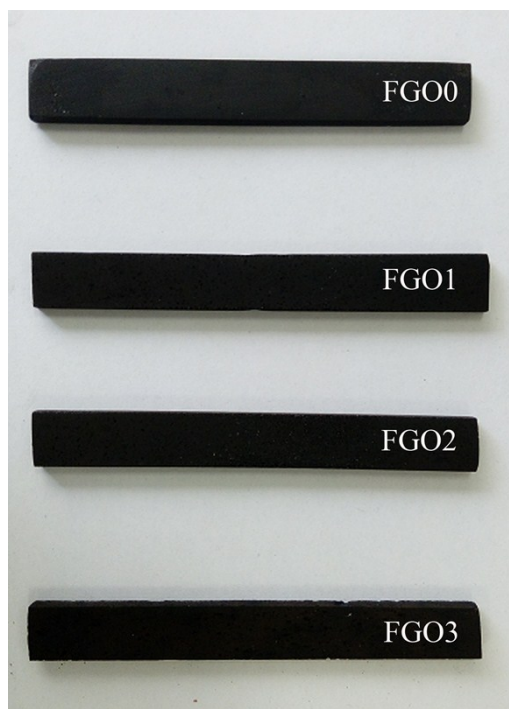

**Fig. S1** The photographs of cured samples of neat furan resin and its GO nanocomposites.
